# Supplementary material for: Glutamate uptake is important for osmoregulation and survival in the rice pathogen Burkholderia glumae
Source: PubMed Central journal article supplement (PMC5749808; doi:10.1371/journal.pone.0190431), 2018-01-02

### Levels of internal K<sup>+</sup>

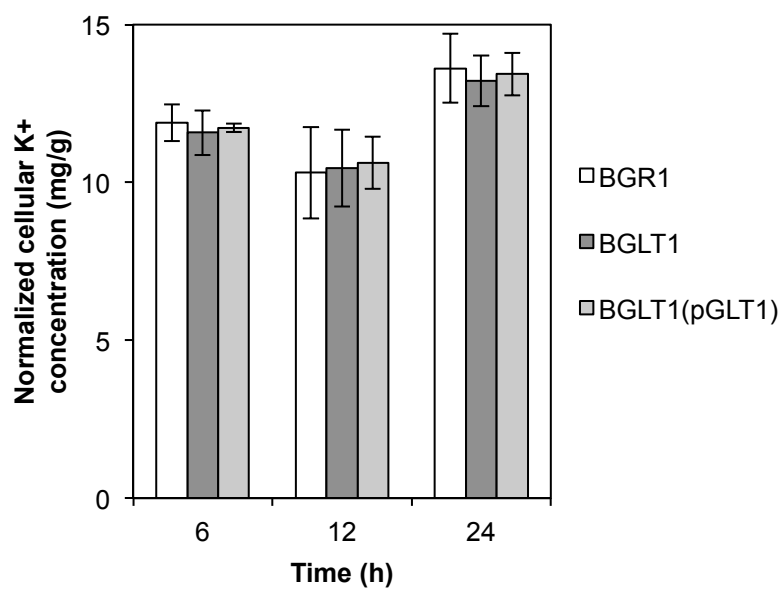

Supplement: pone.0190431.s001.pdf [file pone.0190431.s001.pdf]
