# Supplementary material for: Glutamate uptake is important for osmoregulation and survival in the rice pathogen Burkholderia glumae
Source: PubMed Central journal article supplement (PMC5749808; doi:10.1371/journal.pone.0190431), 2018-01-02

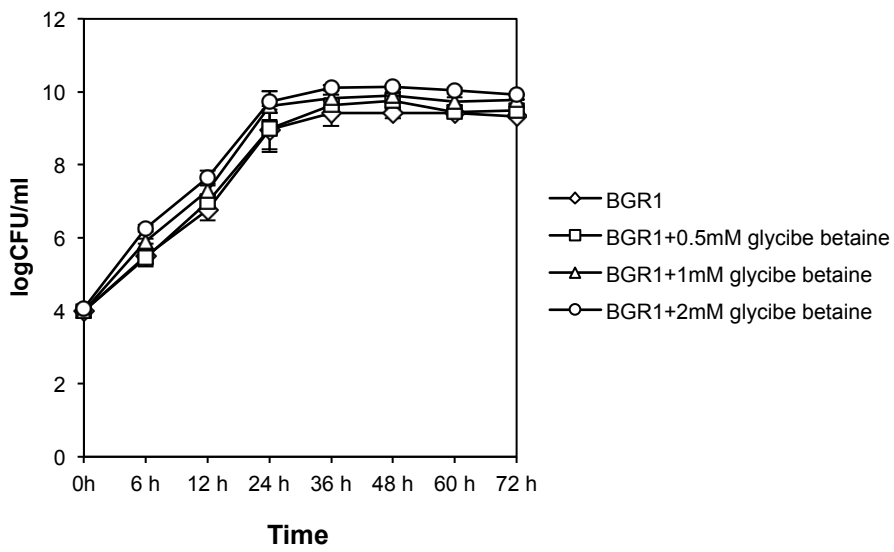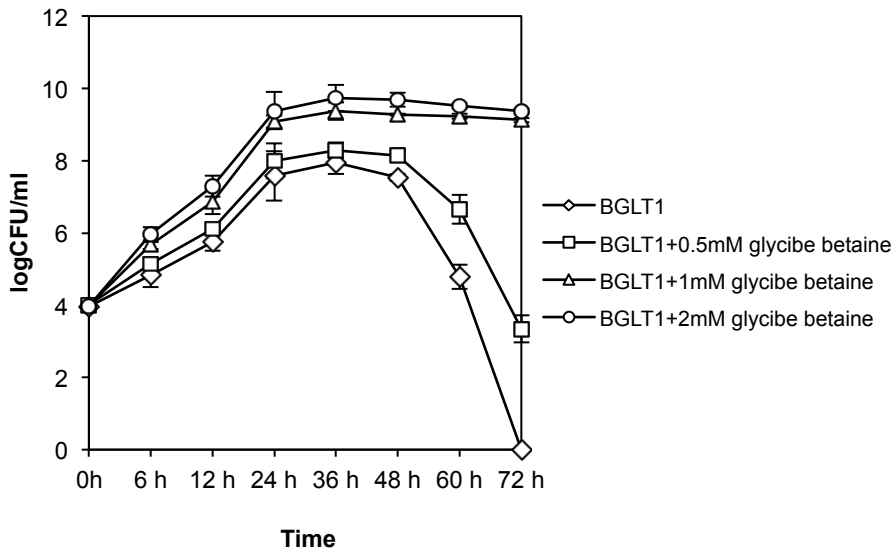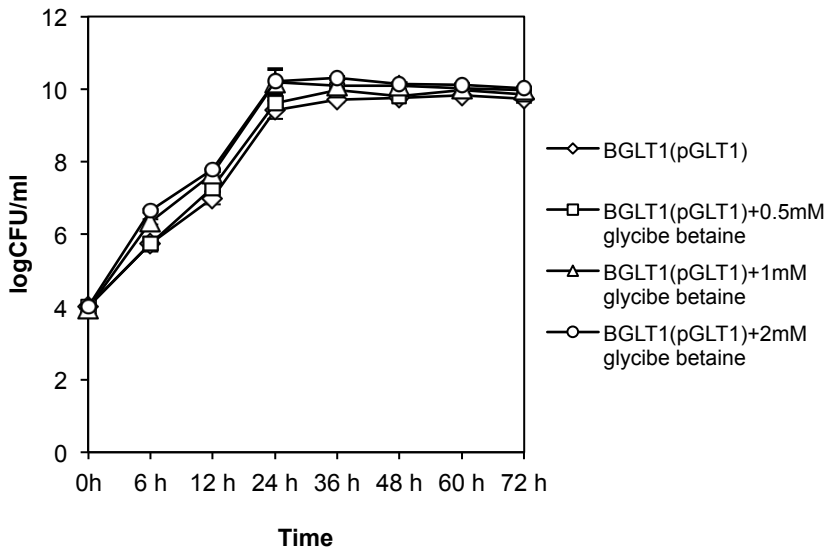

Supplement: pone.0190431.s002.pdf [file pone.0190431.s002.pdf]
